# Supplementary material for: 1D MnSe@carbon nanofiber as a high-rate anode for sodium-ion batteries: electrochemical and ex situ mechanistic investigation of Na+ charge storage
Source: Royal Society of Chemistry journal article supplement (doi:10.1039/d3nj04735k), 2023-12-06
Supplement: d3nj04735k1.pdf [file d3nj04735k1.pdf]

**1D MnSe@Carbon Nanofiber as High-rate Anode for Sodium-ion Battery:  
Electrochemical and Ex situ Mechanistic Investigation of Na<sup>+</sup> Charge Storage**

Elayaperumal Sujithkrishnan<sup>a</sup>, Sivasubramaniam Ragul<sup>a</sup>, Shamima Hussain<sup>b</sup>, Villa Krishna Harika<sup>c</sup> and Perumal Elumalai<sup>a, \*</sup>

<sup>a</sup>Electrochemical Energy Storage Lab, Department of Green Energy Technology  
Madanjeet School of Green Energy Technologies, Pondicherry University, Puducherry-605014, India

<sup>b</sup>UGC-DAE CSR, Kalpakkam Node, Kokilamedu, Tamilnadu - 603104, India

<sup>c</sup>Department of Green Energy Technology, Madanjeet School of Green Energy Technologies,  
Pondicherry University, Puducherry-605014, India

---

\*Corresponding Author.

E-mail: drperumalelumalai@pondiuni.ac.in and drperumalelumalai@gmail.com (P. Elumalai)

Tel. : +91-413-2654867

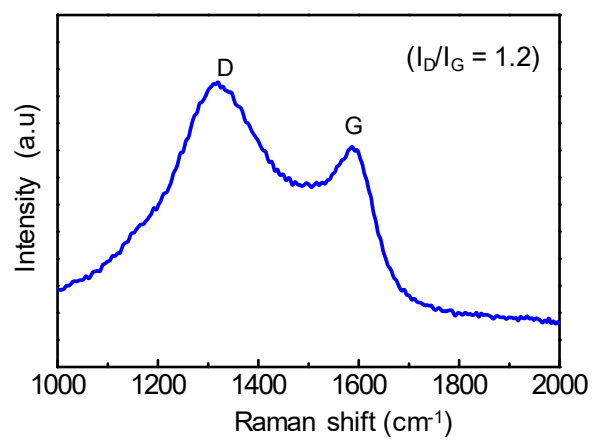

**Fig. S1.** Raman spectrum recorded for the pristine CNF sample.

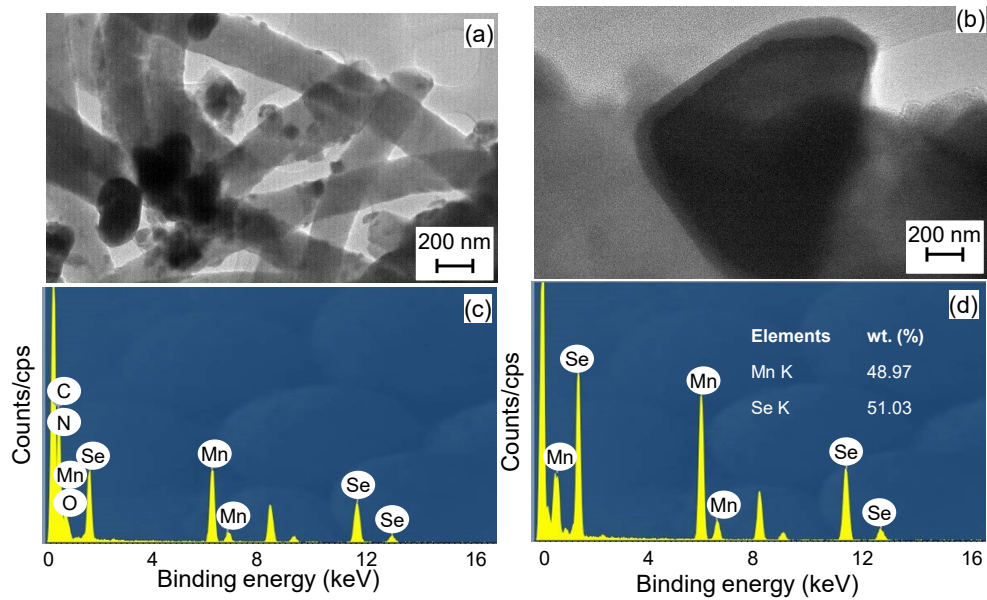

**Fig. S2.** (a,b) HR-TEM images of the MnSe@CNF samples focusing on the carbon nanofibers and the MnSe nanoparticles, (c) EDAX profile recorded at electrospun MnSe@CNF and (d) EDAX profile recorded at the MnSe nanoparticles embedded on the carbon nanofibers.

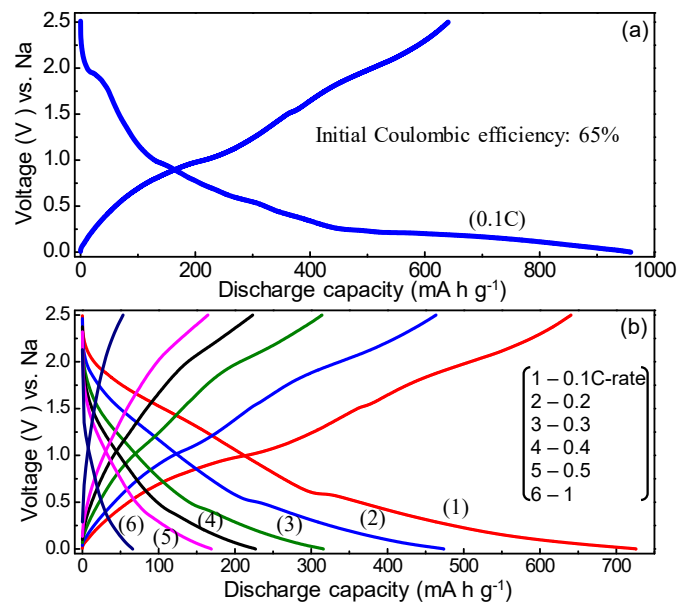

**Fig. S3.** (a) Initial charge-discharge profile at 0.1C-rate and (b) Charge-discharge profiles recorded at various C-rates for the SIB half-cell containing the MnSe@CNF anode.

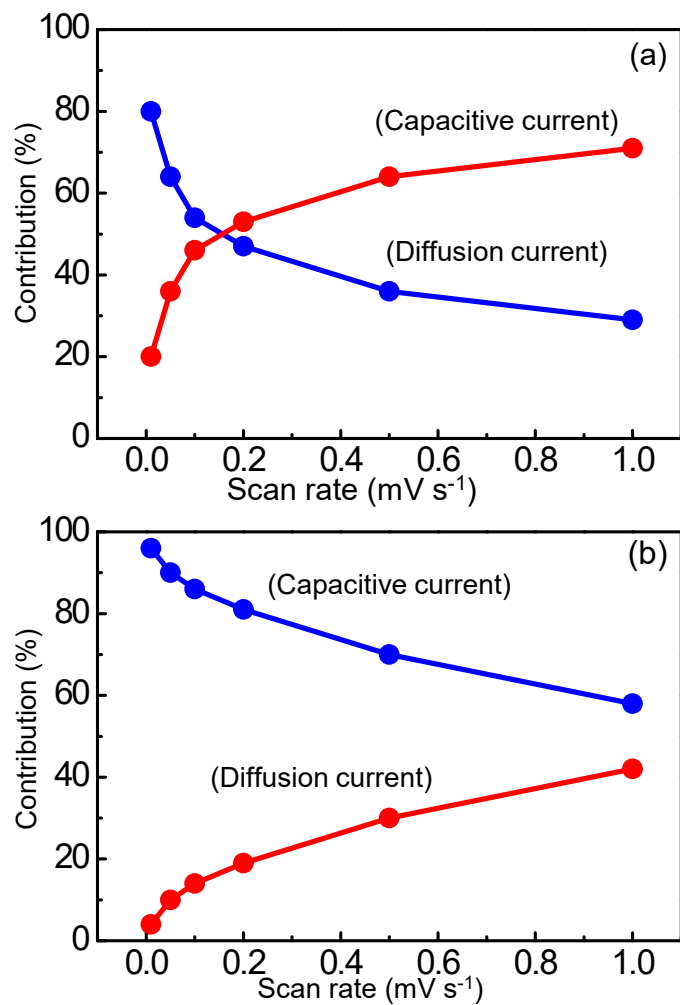

**Fig. S4.** Deconvoluted capacitive and diffusion percentage at various scan rates for (a) peak current and (b) non-peak current.

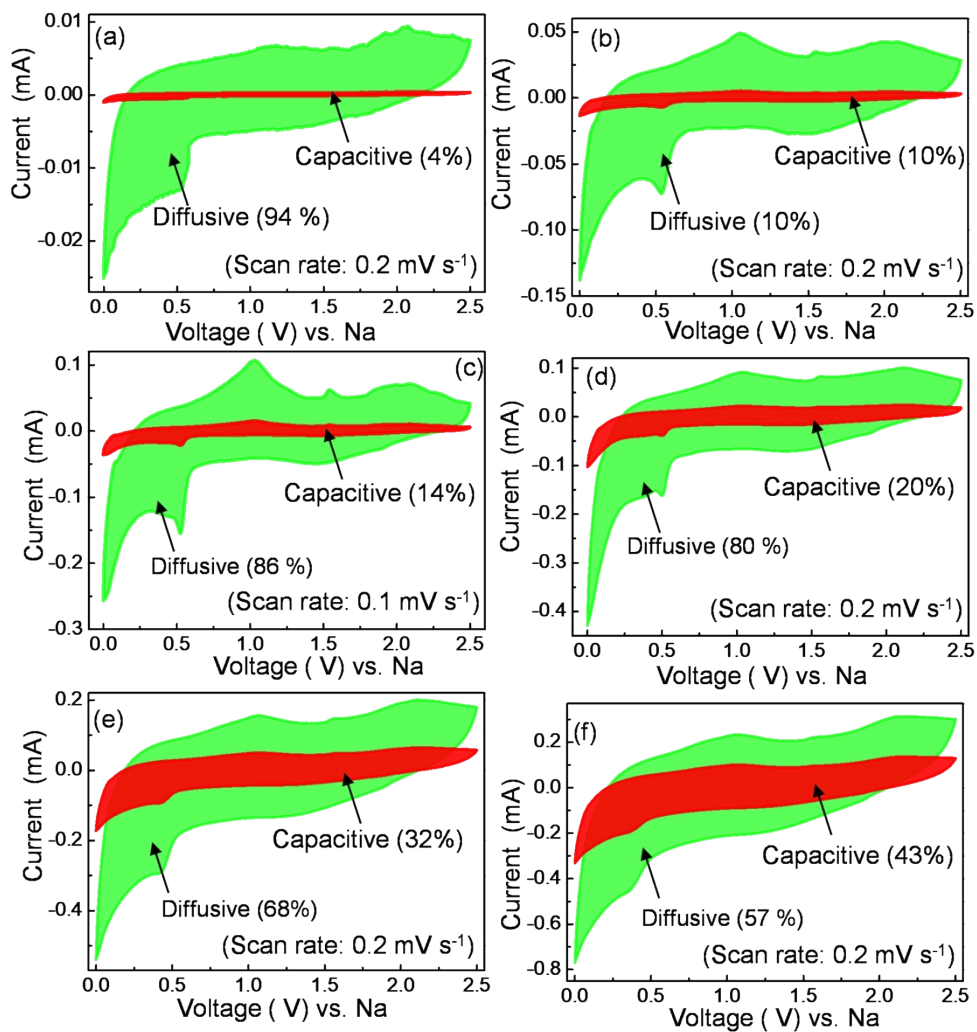

**Fig. S5.** (a-f) CV profiles representing the capacitive and diffusive current contribution at the anodic and cathodic peak currents at different scan rate for the SIB half-cell having the MnSe@CNF anode (Na|1M NaClO<sub>4</sub>|MnSe@CNF).

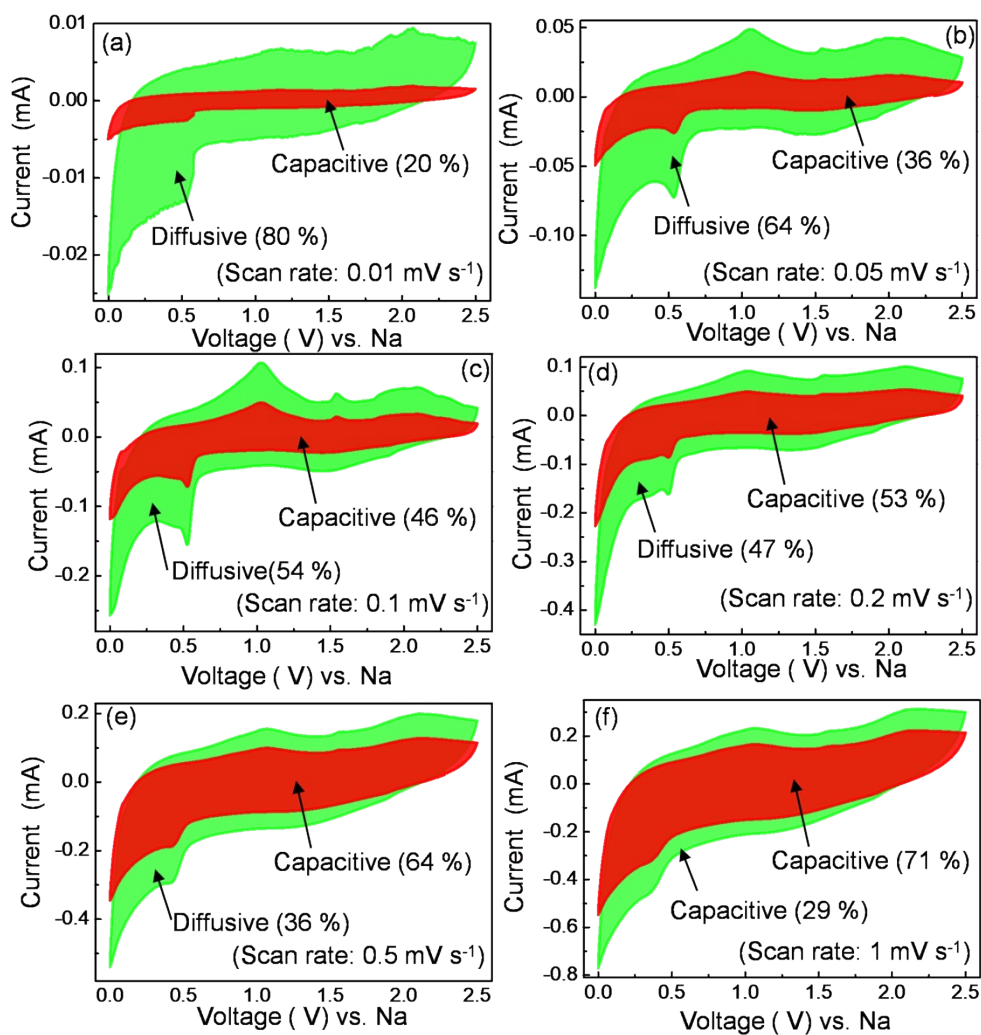

**Fig. S6.** (a-f) CV profiles representing the capacitive and diffusive current contribution at no peak current potential at different scan rate for the SIB half-cell having the MnSe@CNF anode (Na|1M NaClO<sub>4</sub>|MnSe@CNF).
